# Supplementary material for: White-light-emitting properties of SrTiO3:Pr3+ nanoparticles
Source: Royal Society of Chemistry journal article supplement (doi:10.1039/c4ra16757k), 2015-01-01
Supplement: c4ra16757k1.pdf [file c4ra16757k1.pdf]

## Supplementary Information

### White-Light-Emitting Properties of SrTiO<sub>3</sub>:Pr<sup>3+</sup> Nanoparticles

Wei Tang, Ye Sun,\* Miao Yu,\* Xiao Liu, Yongqi Yin, Bin Yang, Limei Zheng, Feng

Qin, Zhiguo Zhang, Wenwu Cao

Table S1 Structural parameters of SrTiO<sub>3</sub>:*m*Pr<sup>3+</sup> at room temperature refined with Pm3m space group.

| <i>m</i>                   | 0         | 0.01     | 0.03      | 0.05      | 0.06      | 0.07      | 0.08     | 0.1       |
|----------------------------|-----------|----------|-----------|-----------|-----------|-----------|----------|-----------|
| <i>a</i> (Å)               | 3.9186(7) | 3.914(1) | 3.9112(6) | 3.9121(4) | 3.9132(6) | 3.9137(5) | 3.915(1) | 3.9164(9) |
| <i>V</i> (Å <sup>3</sup> ) | 60.2      | 60.0     | 59.8      | 59.9      | 59.9      | 60.0      | 60.0     | 60.1      |

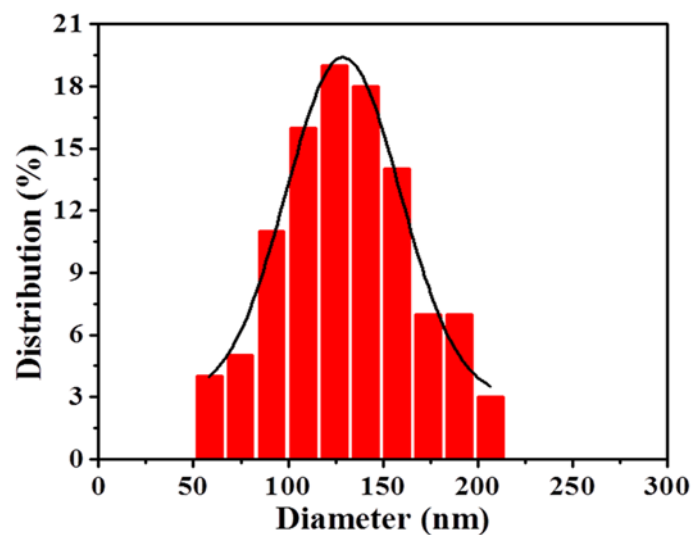

Fig. S1 Size distribution of the SrTiO<sub>3</sub>:0.06Pr<sup>3+</sup> nanoparticles.

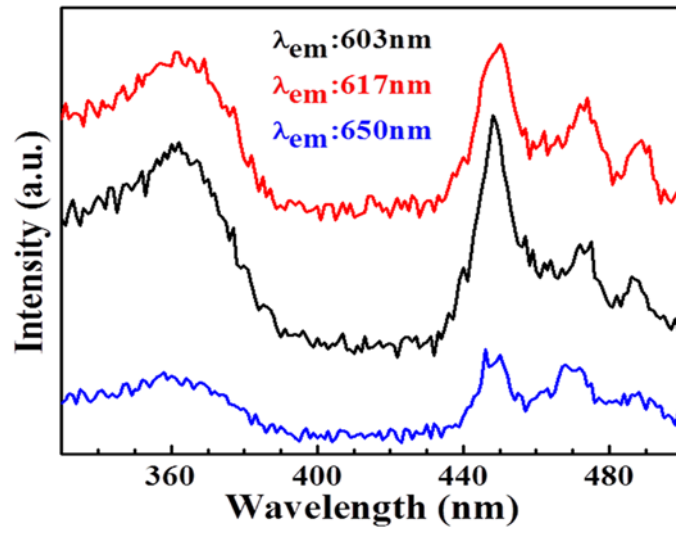

Fig. S2 PLE spectra of the SrTiO<sub>3</sub>:0.06Pr<sup>3+</sup> monitored at 603 nm, 617 nm and 650 nm.

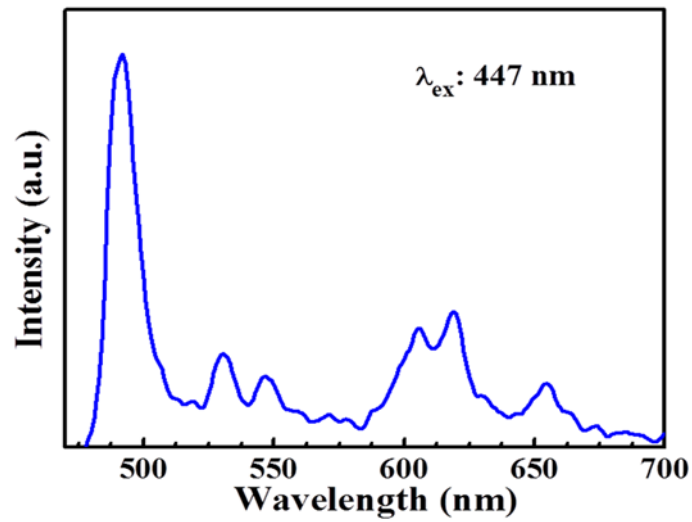

Fig. S3 PL of the as-grown SrTiO<sub>3</sub>:0.06Pr<sup>3+</sup> sample under 447 nm excitation.

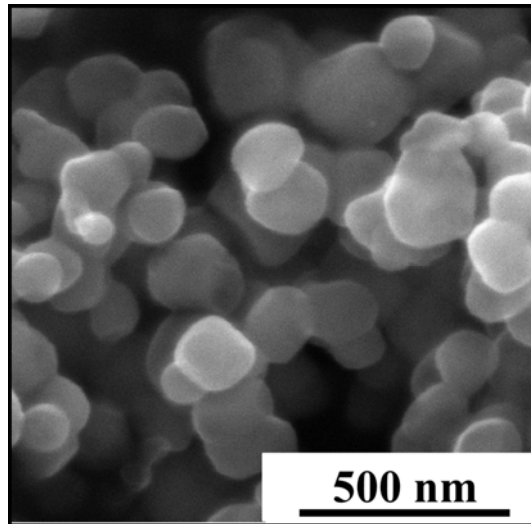

Fig. S4 SEM image of 1350 °C annealed SrTiO<sub>3</sub>:0.06Pr<sup>3+</sup> nanoparticles.

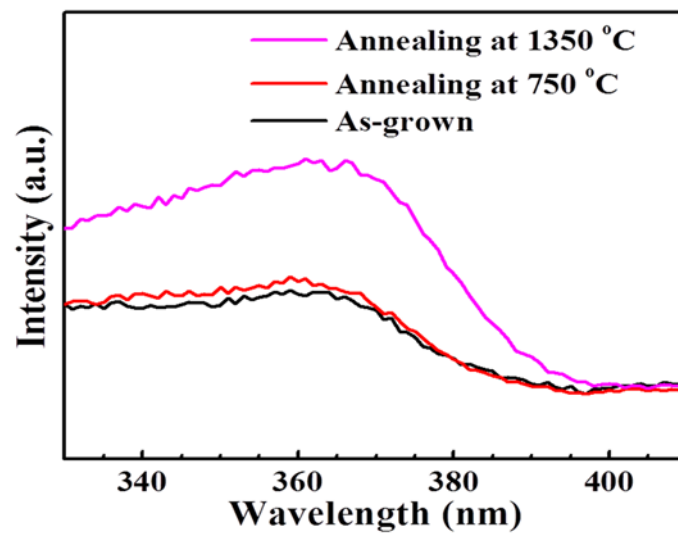

Fig. S5 PLE spectra of as-grown and annealed SrTiO<sub>3</sub>:0.06Pr<sup>3+</sup> samples monitored at 491 nm.

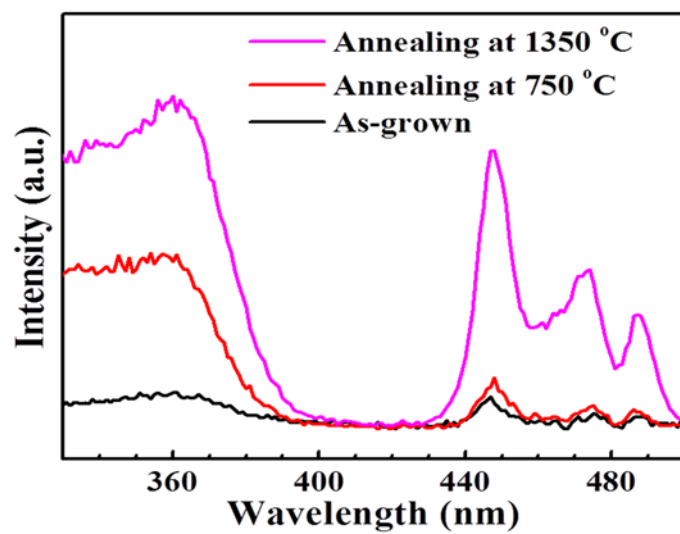

Fig. S6 PLE spectra of as-grown and annealed SrTiO<sub>3</sub>:0.06Pr<sup>3+</sup> samples monitored at 617 nm.

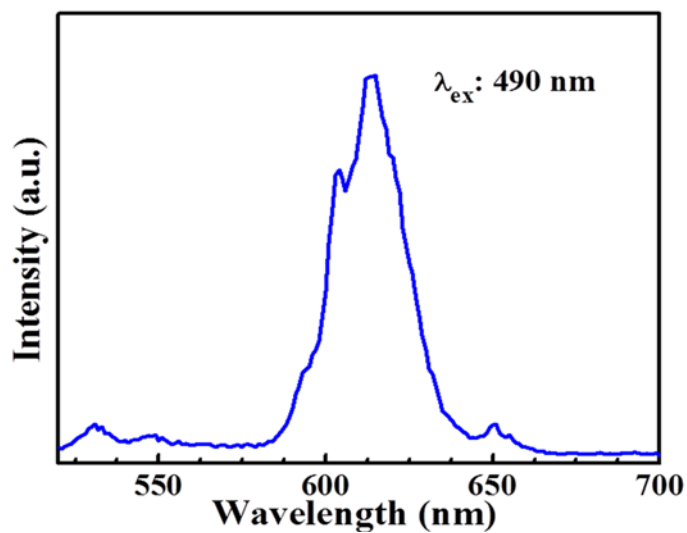

Fig. S7 PL of SrTiO<sub>3</sub>:0.06Pr<sup>3+</sup> annealed at 1350 °C (under 490 nm excitation).

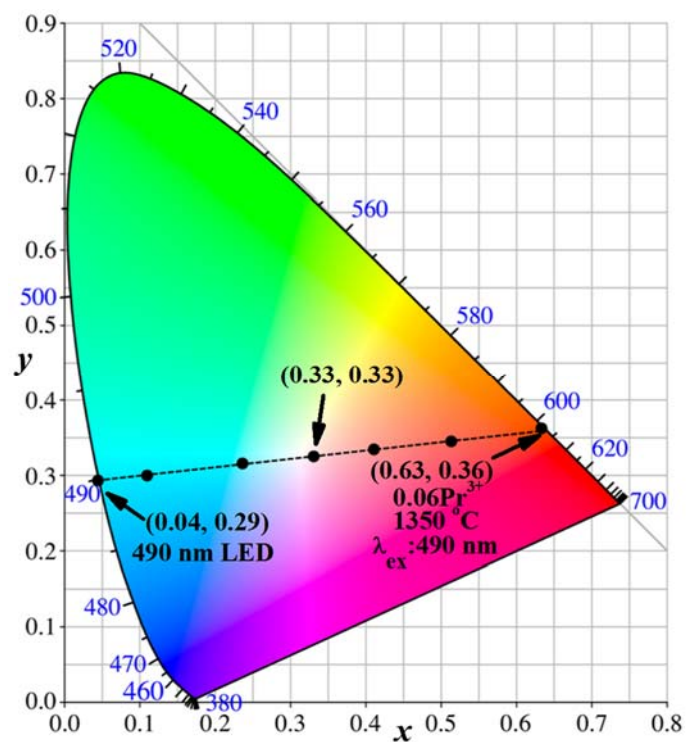

Fig. S8 CIE chromaticity diagram and chromaticity coordinates ( $x$ ,  $y$ ) of emission from  $\text{SrTiO}_3:0.06\text{Pr}^{3+}$  annealed at  $1350^\circ\text{C}$  (under  $490\text{ nm}$  excitation).

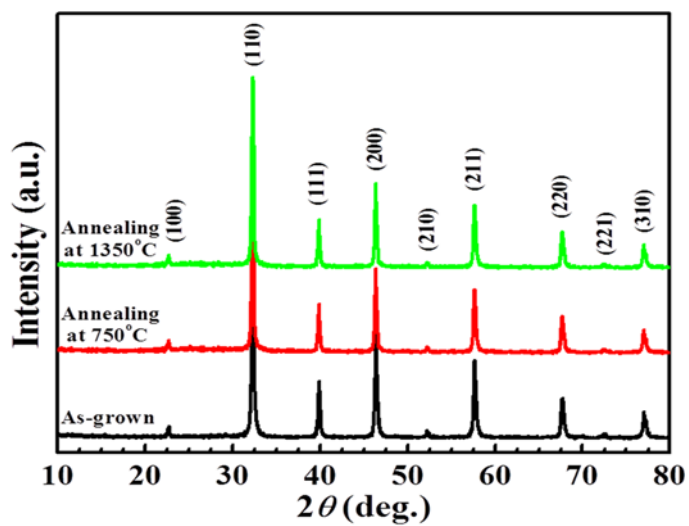

Fig. S9 XRD patterns of as-grown and annealed  $\text{SrTiO}_3:0.06\text{Pr}^{3+}$  samples.

Table S2 Structural parameters of as-grown and annealed SrTiO<sub>3</sub>:0.06Pr<sup>3+</sup> refined with Pm3m space group.

|                    | As-grown  | Annealing at 750 °C | Annealing at 1350 °C |
|--------------------|-----------|---------------------|----------------------|
| a(Å)               | 3.9132(6) | 3.9076(4)           | 3.9056(4)            |
| V(Å <sup>3</sup> ) | 59.9      | 59.7                | 59.6                 |

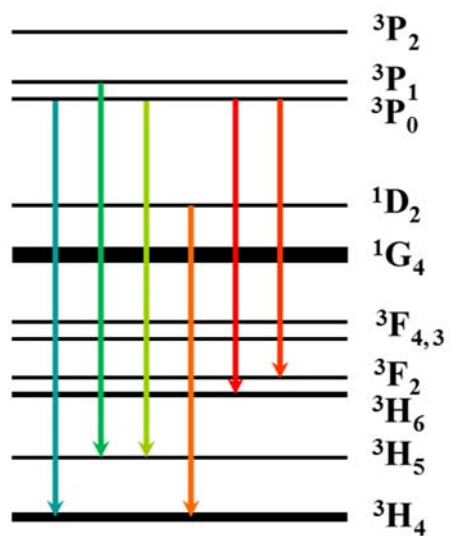

Fig. S10 The energy level diagram of Pr<sup>3+</sup> ions.
